# Supplementary material for: Facile and rapid fabrication of porous CuBr films by solution oxidation and their application for the exclusive detection of NH3 at room temperature
Source: Royal Society of Chemistry journal article supplement (doi:10.1039/d1ta08750a), 2021-12-07
Supplement: d1ta08750a1.pdf [file d1ta08750a1.pdf]

## Supplementary Information

### **Facile and rapid fabrication of porous CuBr films by a solution oxidation and their application for the exclusive detection of NH<sub>3</sub> at room temperature**

Sang-Kwon Kim,<sup>a</sup> Byeong-Hun Yu,<sup>a</sup> Chan Woong Na,<sup>b</sup> Jong-Heun Lee,<sup>c</sup>  
and Ji-Wook Yoon<sup>a,\*</sup>

<sup>a</sup>*Department of Information Materials Engineering, Division of Advanced Materials Engineering, Jeonbuk National University, Jeonju 54896, Republic of Korea.*

<sup>b</sup>*Dongnam Division, Korea Institute of Industrial Technology, Busan 46938, Republic of Korea*

<sup>c</sup>*Department of Materials Science and Engineering, Korea University, Seoul 02841, Republic of Korea.*

E-mail: [jwyoona@jbnu.ac.kr](mailto:jwyoona@jbnu.ac.kr) (Ji-Wook Yoon)

## SUPPLEMENTARY FIGURES

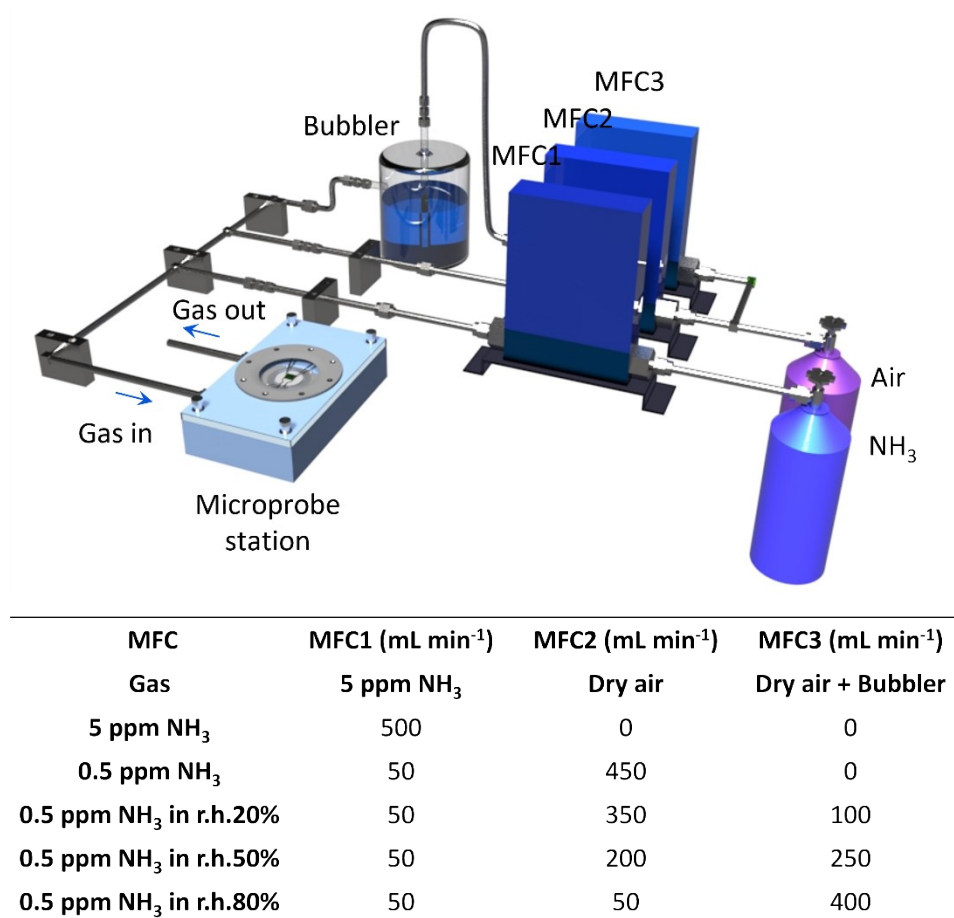

**Fig. S1** Setup and flow configuration for gas sensing test.

## SUPPLEMENTARY FIGURES

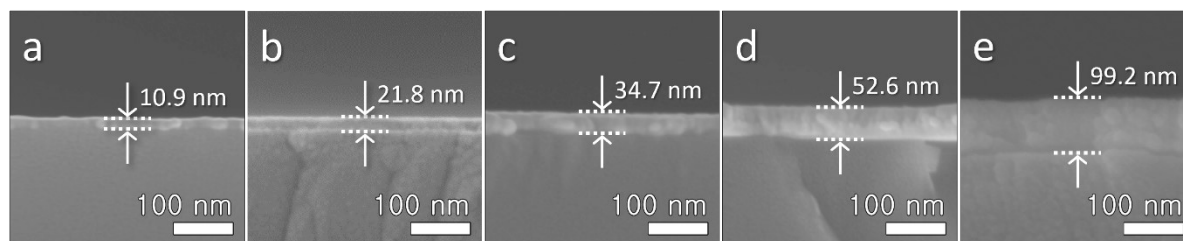

**Fig. S2** SEM images of cross-sectional views of the Cu films prepared by sputtering.

SUPPLEMENTARY FIGURES

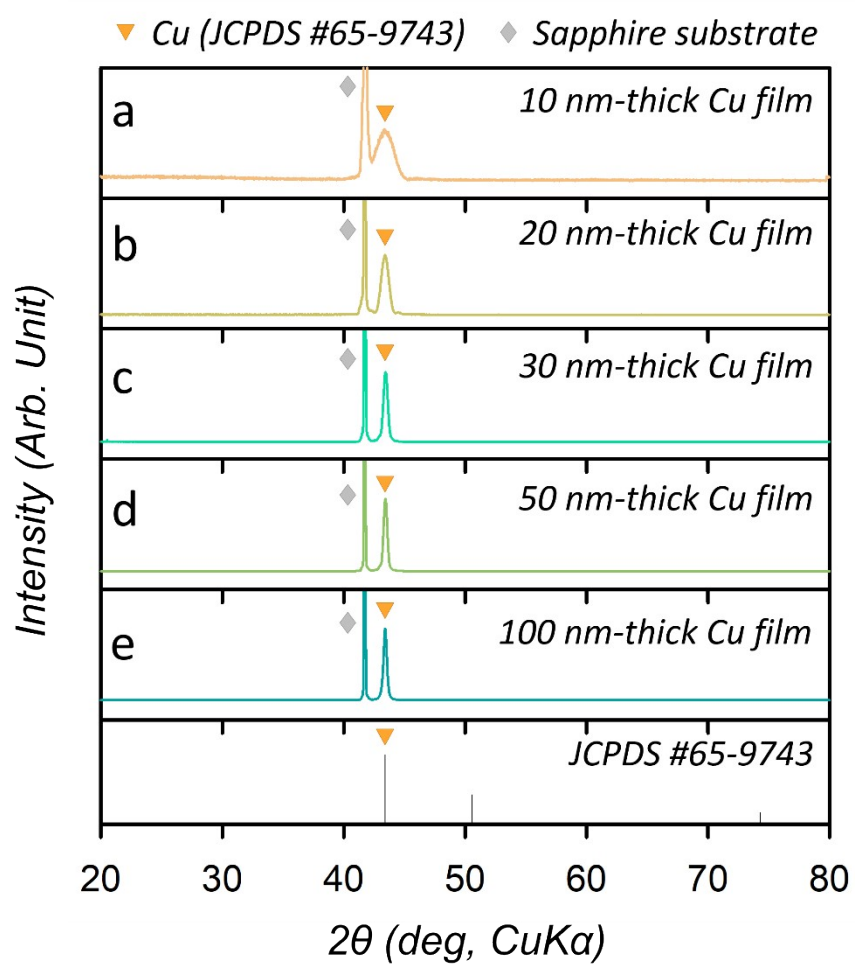

**Fig. S3** XRD patterns of the Cu films prepared by sputtering.

## SUPPLEMENTARY FIGURES

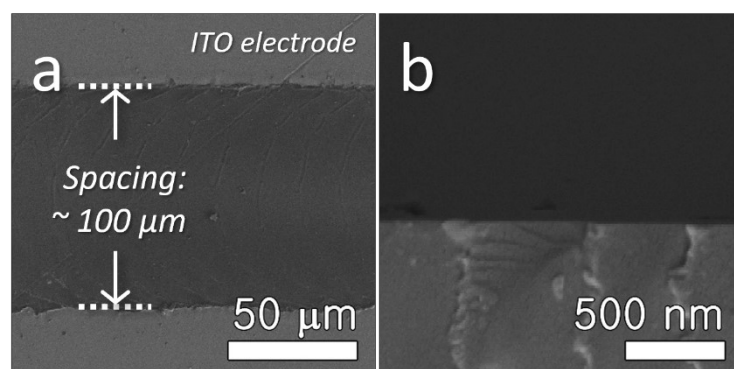

**Fig. S4** SEM images of top (a) and cross-sectional (b) views of the 10n-120s sensor. CuBr particles were rarely observed on the sensor substrate after oxidation in solution.

# SUPPLEMENTARY FIGURES

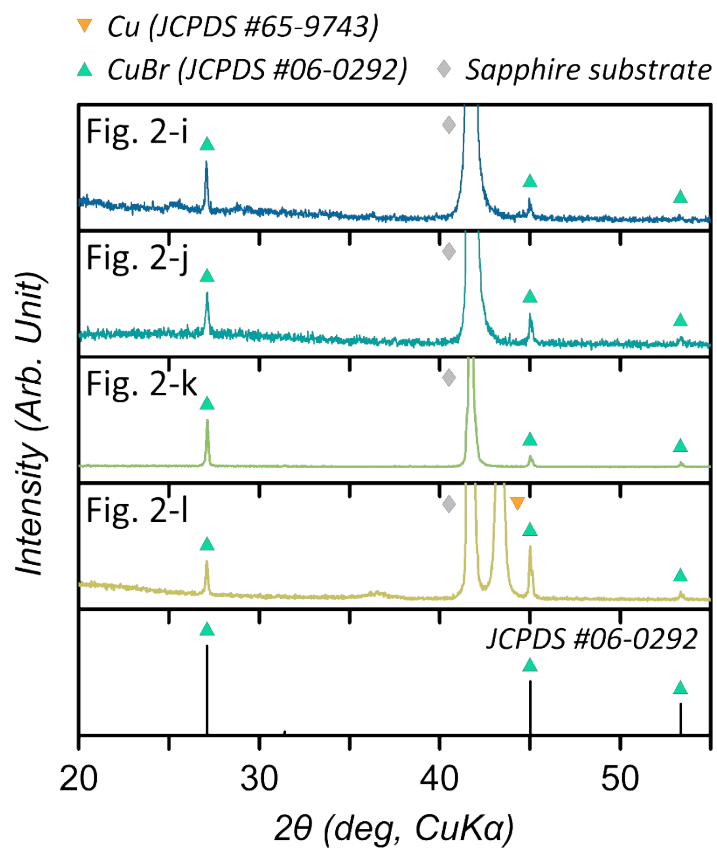

**Fig. S5** XRD pattern of the CuBr films prepared by immersing 20 – 100 nm-thick Cu films in the CuBr<sub>2</sub> solutions for 120 s.

## SUPPLEMENTARY FIGURES

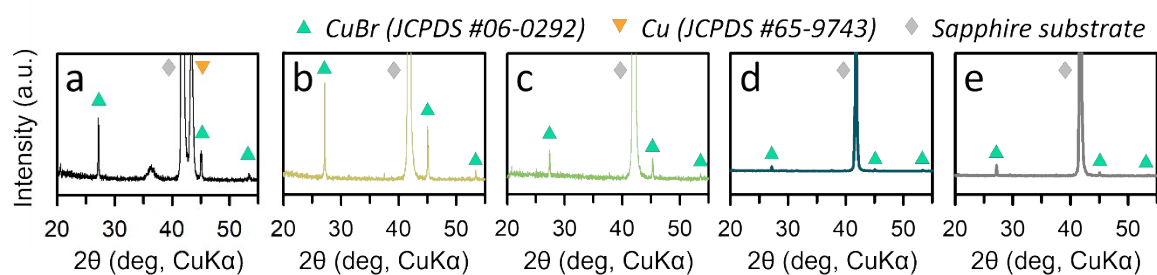

**Fig. S6** XRD pattern of the CuBr film prepared by immersing 30 nm-thick Cu films in the CuBr<sub>2</sub> solutions for 10 – 300 s: (a) 30n-10s, (b) 30n-30s, (c) 30n-60s, (d) 30n-180s, and (e) 30n-300s. All the specimens consisted of CuBr, whereas the 30n-10s specimen additionally contained Cu.

# SUPPLEMENTARY FIGURES

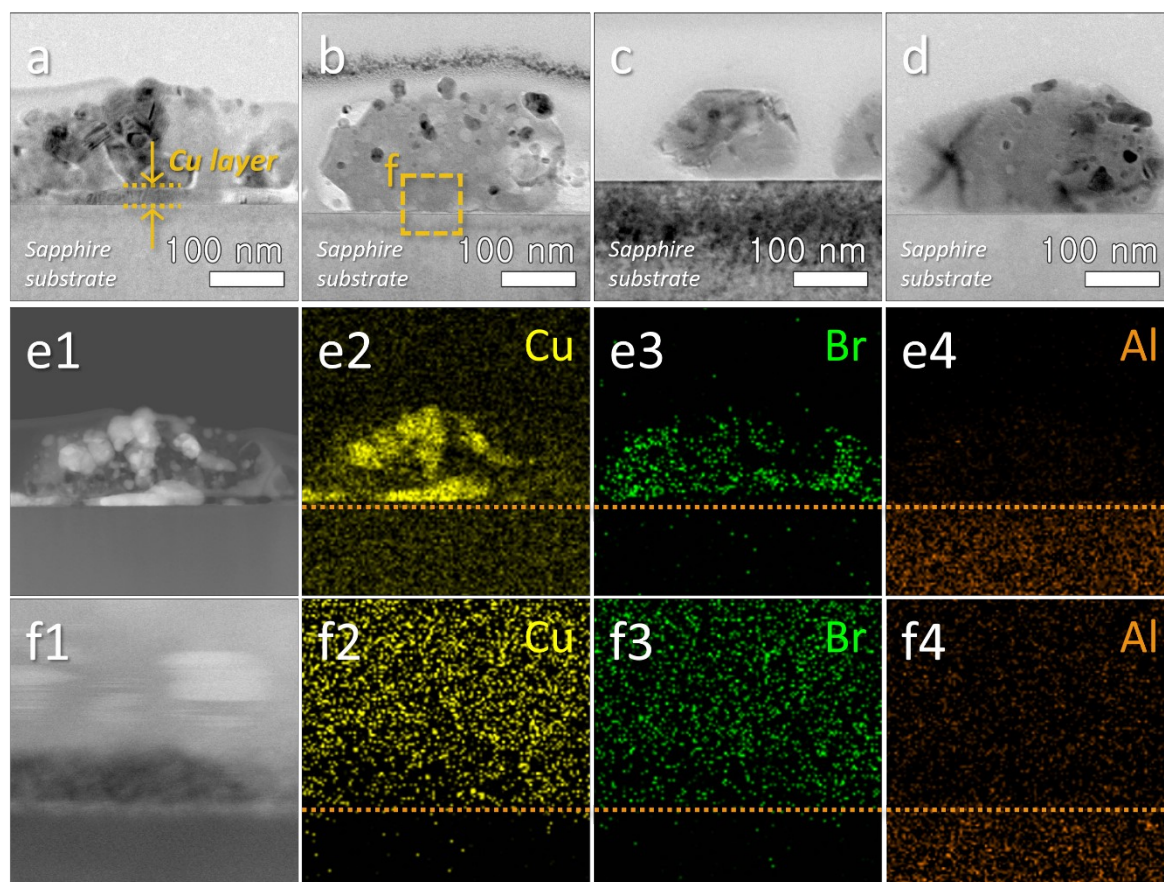

**Fig. S7** TEM images of the FIB-treated CuBr film prepared by immersing 30 nm-thick Cu films in the  $\text{CuBr}_2$  solutions for (a) 10, (b) 30, (c) 60, and (d) 120 s. Elemental mapping images for the FIB-treated 30n-10s (e) and 30n-30s (f). This clearly shows that the oxidation of Cu to  $\text{Cu}^+$  in CuBr was complete within 30 s.

SUPPLEMENTARY FIGURES

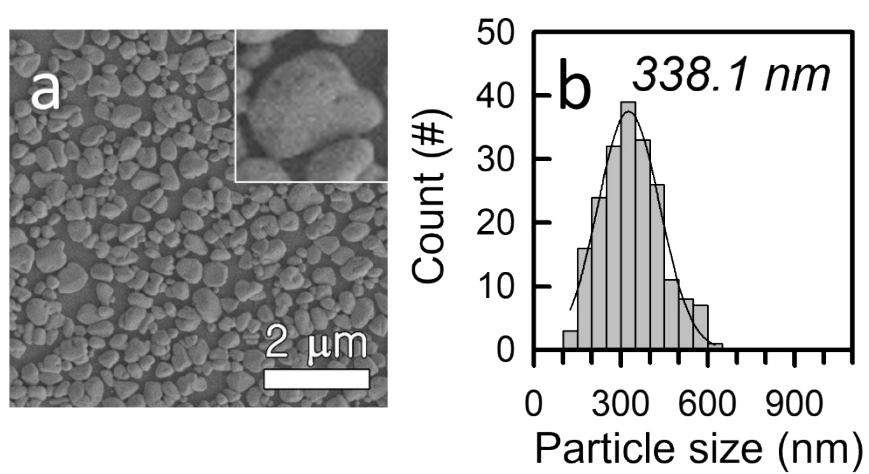

**Fig. S8** (a) SEM image and (b) particle size distribution of the 30n-10s film.

SUPPLEMENTARY FIGURES

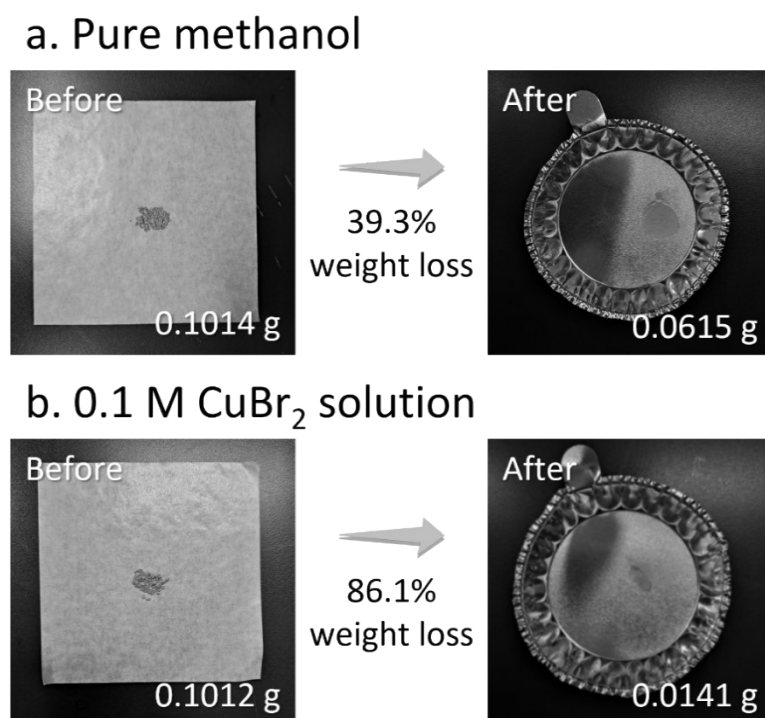

**Fig. S9** Weight loss of commercial CuBr powders measured after dissolving in (a) pure methanol and (b) 0.1 M CuBr<sub>2</sub> solution for 3 h. The weight loss of CuBr powders in 0.1 M CuBr<sub>2</sub> solution (86.1%) was significantly higher than that in pure methanol (39.3%).

## SUPPLEMENTARY FIGURES

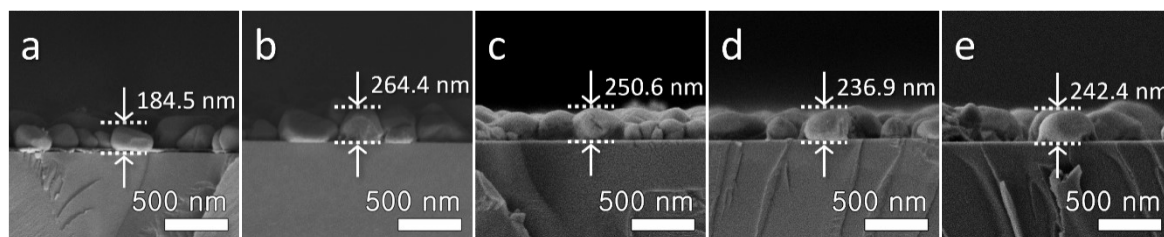

**Fig. S10** Cross-sectional SEM images of the 30n-10s (a), 30n-30s (b), 30n-60s (c), 30n-180s (d), and 30n-300s (e) specimens.

## SUPPLEMENTARY FIGURES

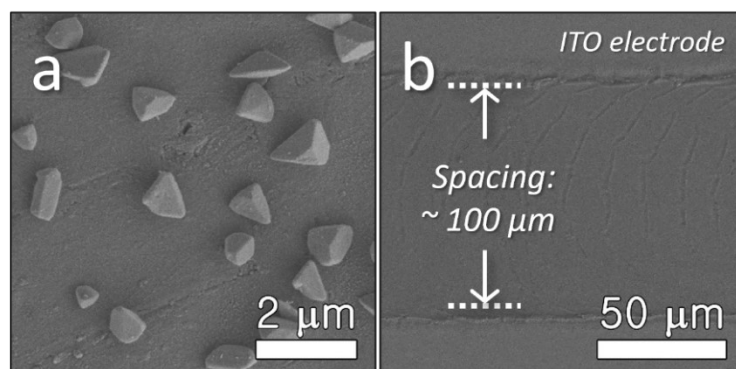

**Fig. S11** SEM images of the CuBr films prepared by immersing 30 nm-thick Cu films in (a) 0.001 M and (b) 0.1 M for 120 s.

## SUPPLEMENTARY FIGURES

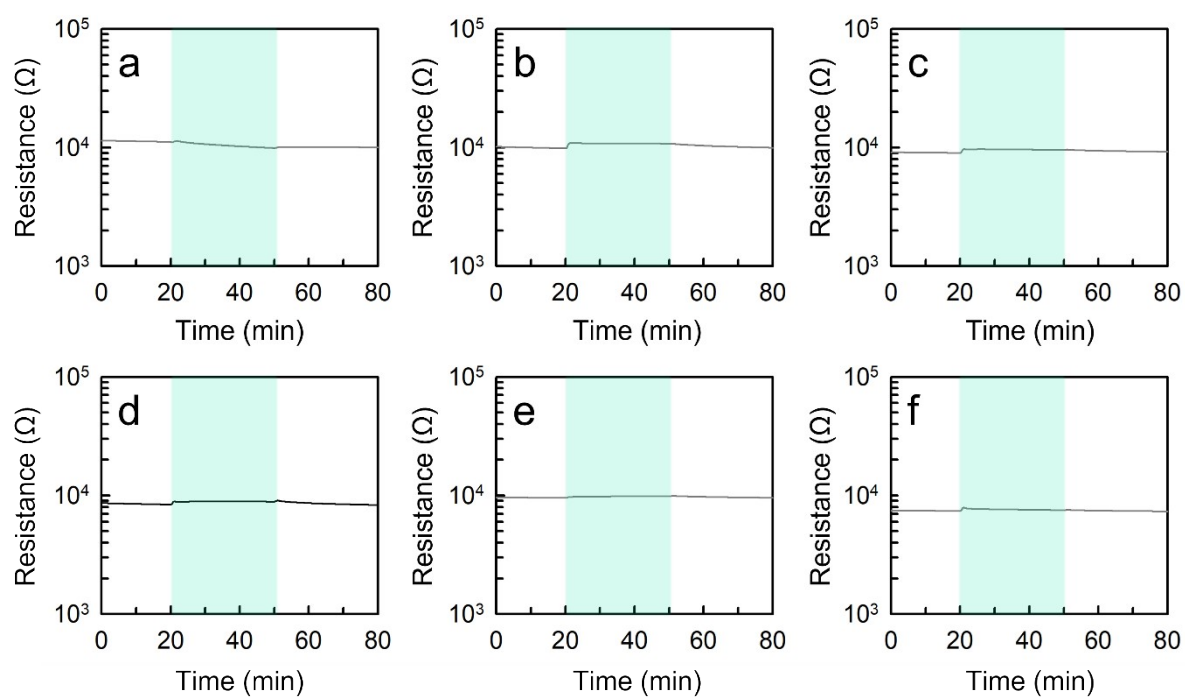

**Fig. S12** Resistance changes of the 30n-120s sensor upon exposure to 5 ppm (a)  $\text{NO}_2$ , (b) acetone, (c) CO, (d) ethanol, (e) acetaldehyde, and (f) formaldehyde.

# SUPPLEMENTARY FIGURES

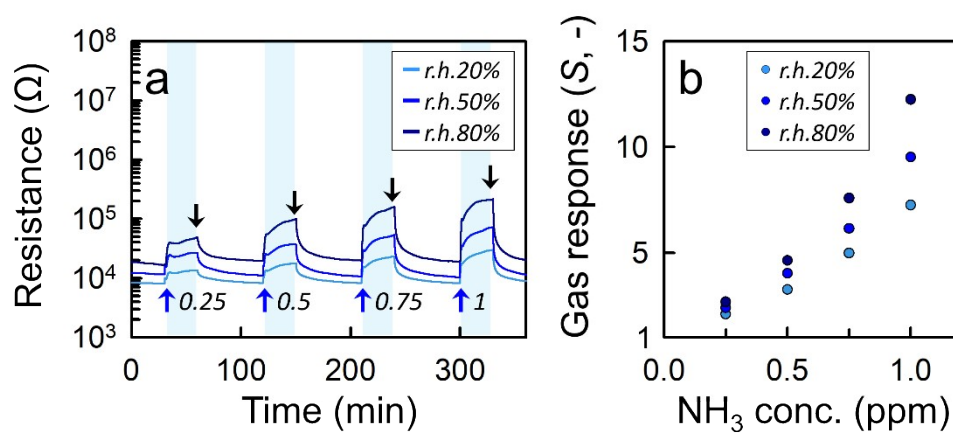

**Fig. S13** (a) Resistance changes and (b) gas response of the 30n-120s sensor to 0.25 – 1 ppm  $\text{NH}_3$  at various humidity levels.

## SUPPLEMENTARY FIGURES

**Table S1** Comparison of our CuBr sensor with those reported in the literature.

| Structure   | Synthesis method                    | Synthesis temperature (°C) | Response (-) | Conc. (ppm) | Humidity condition | Ref.      |
|-------------|-------------------------------------|----------------------------|--------------|-------------|--------------------|-----------|
| Particles   | Powder mixing                       | RT                         | 12.7         | 5           | Dry                | 27        |
| Dense film  | Solution oxidation                  | RT                         | 5.5          | 1           | -                  | 43        |
|             | RF sputtering                       | RT                         | 20           | 5           | dry                | 44        |
|             | RF sputtering                       | RT                         | 8            | 10          | dry                | 45        |
|             | RF sputtering                       | RT                         | 12           | 10          | dry                | 46        |
| Porous film | Flame pyrolysis and dry bromination | 1500-2000                  | 276          | 5           | dry                | 26        |
|             |                                     |                            | 20           | 1           | r.h. 90%           |           |
|             | Thermal evaporation                 | 500                        | 220          | 5           | dry                | 30        |
|             |                                     |                            | 12           | 1           | r.h. 80%           |           |
|             | Solution oxidation                  | RT                         | 12           | 10          | dry                | 35        |
|             | Solution oxidation                  | RT                         | 211          | 5           | dry                | This work |
|             |                                     |                            | 12.2         | 1           | r.h. 80%           | This work |
